# Supplementary material
Source: Springer Nature journal article supplement (https://www.springermedizin.de/resource/supplementary/12913_2011_2661_MOESM1_ESM.pdf/9531154)

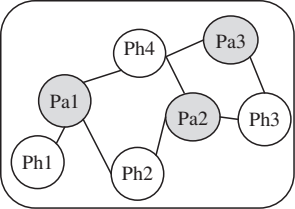

**(a)** Patient-physician network

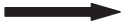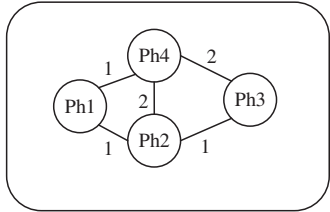

**(b)** Corresponding PCN

Supplement: MOESM1 [file 9531154]
